# Supplementary material
Source: Springer Nature journal article supplement (https://www.springermedizin.de/resource/supplementary/12888_2010_762_MOESM1_ESM.pdf/9478628)
Supplement: MOESM1 [file 9478628]

Total Designated Sample

12,630

The baseline survey in 1993

Questionnaires placed

Questionnaires recovered

Questionnaires not recovered

11,565

1,065

A follow-up survey

Exist

Died

Lost to follow up

10,898

541

126

The second wave survey in 2000

Questionnaires placed

Questionnaires recovered

Questionnaires not recovered

9,650

1,248

The number of this study

Not depression in 1993

Depression in 1993

9,201 (Total of analyzed subjects)

449 (excluded)
